# Supplementary material
Source: ML conference proceedings conference paper supplement (https://proceedings.mlr.press/v124/yang20a.html)
Supplement: Supplementary file [file yang20a-supp.pdf]

# Supplement for The Hawkes Edge Partition Model

## A INFERENCE

Next we shall explain the Gibbs sampling algorithm to infer the parameters of the Hawkes-EPM.

### A.1 GIBBS SAMPLING

The conditional intensity function of the Hawkes-EPM, for the directed events from  $u$  to  $v$ , is

$$\begin{aligned}\lambda_{u,v}(t) &= \mu_{u,v} + \sum_{j:t_j \in \mathcal{H}_{v,k',k,u}(t)} \gamma_{k,k'}(t - t_j) \\ &= \sum_{k,k'} \left\{ \mu_{u,k,k',v} + \sum_{j:t_j \in \mathcal{H}_{v,k',k,u}(t)} \alpha_{k,k'} \exp[-(t - t_j)/\delta] \right\}.\end{aligned}\quad (1)$$

**Sampling latent variables**  $\{z_i^s, z_i^d\}_{i=1}^N$ : For each event  $(t_i, s_i, d_i)$ , we utilize an auxiliary binary variable  $b_i$  to denote whether  $i$ -th event is triggered by the base rate (exogenous) or by opposite past interactions (endogenous) as

$$(b_i \mid -) \sim \text{Bernoulli}(\mu_{s_i, d_i} / \lambda_{s_i, d_i}(t_i)). \quad (2)$$

Then, we sample the latent patterns  $(z_i^s, z_i^d)$  for each event as

$$(z_i^s, z_i^d \mid -) \sim \begin{cases} \text{Cat}\left(\frac{\{\mu_{s_i, k, k', d_i}\}_{k, k'=1}^K}{\lambda_{s_i, d_i}(t_i)}\right), & \text{if } b_i = 1 \\ \text{Cat}\left(\frac{\{\check{\lambda}_{s_i, k, k', d_i}(t_i)\}_{k, k'=1}^K}{\lambda_{s_i, d_i}(t_i)}\right), & \text{otherwise} \end{cases} \quad (3)$$

where  $\text{Cat}(\cdot)$  denotes the categorical distribution, and we define

$$\check{\lambda}_{s_i, k, k', d_i}(t_i) \equiv \sum_{j:t_j \in \mathcal{H}_{d_i, k', k, s_i}(t)} \alpha_{k, k'} \exp[-\delta(t_i - t_j)]. \quad (4)$$

Given the sampled latent variables, we update the sufficient statistics as

$$\begin{aligned}\hat{m}_{u, k, k', v} &\equiv \sum_j \mathbf{1}(b_j = 1, s_j = u, d_j = v, z_j^s = k, z_j^d = k'), \\ \check{m}_{u, k, k', v} &\equiv \sum_j \mathbf{1}(b_j = 0, s_j = u, d_j = v, z_j^s = k, z_j^d = k').\end{aligned}\quad (5)$$

The log-posterior of the observed temporal events  $\mathcal{D} \equiv \{(t_i, s_i, d_i)\}_{i=1}^N$  is shown in Eq. 6

$$\begin{aligned}\mathcal{L}(\Theta) &= \sum_i \log \left\{ \mu_{s_i, d_i} + \sum_{k, k'} \sum_{j:t_j \in \mathcal{H}_{d_i, k', k, s_i}(t_i)} \alpha_{k, k'} \exp[-(t_i - t_j)/\delta] \right\} \\ &\quad - \sum_i \left\{ \mu_{s_i, d_i} T + \sum_{k, k'} \sum_{j:t_j \in \mathcal{H}_{d_i, k', k, s_i}(t_i)} \alpha_{k, k'} \delta (1 - \exp[-(t_i - t_j)/\delta]) \right\} \\ &\quad + \log \text{Pr}(\Theta).\end{aligned}\quad (6)$$

**Sampling the kernel parameters**  $\{\alpha_{kk'}\}$ : As we place gamma priors over  $\alpha_{kk'}$  as  $\alpha_{kk'} \sim \text{Gamma}(1, 1)$ , and thus we have

$$\begin{aligned}(\alpha_{kk'} \mid -) &\sim \text{Gamma}(1 + \check{m}_{\cdot, k, k'}, \\ &\quad 1 / \left[ 1 + \sum_i \sum_{j:t_j \in \mathcal{H}_{d_i, k', k, s_i}(t_i)} \frac{1}{\delta} \left( 1 - \exp\left[-\frac{(T - t_j)}{\delta}\right] \right) \right]),\end{aligned}\quad (7)$$

where  $\check{m}_{\cdot,k,k'} \equiv \sum_i \check{m}_{s_i,k,k',d_i}$ , and  $\check{m}_{\cdot,k,k'}$  denotes the total number of endogenous events associated with the latent pattern  $(k, k')$ .

**Sampling the base intensity  $\{\mu_{u,k,k',v}\}$ :** As we have gamma prior over  $\mu_{u,k,k',v}$  as  $\mu_{u,k,k',v} \sim \text{Gamma}(\tilde{\mu}_{u,k,k',v}, 1/(\exp[-\mathbf{x}_{u,v}^T \boldsymbol{\beta}_{kk'}]))$ , and thus we have

$$(\mu_{u,k,k',v} \mid -) \sim \text{Gamma}(\tilde{\mu}_{u,k,k',v} + \hat{m}_{u,k,k',v}, 1/(T + \exp[-\mathbf{x}_{u,v}^T \boldsymbol{\beta}_{kk'}])), \quad (8)$$

Marginalizing out  $\mu_{u,k,k',v}$  from the likelihood leads to

$$\begin{aligned} \Pr(\mathcal{D} \mid \mathbf{x}_{u,v}, \boldsymbol{\beta}_{kk'}) &= \int \Pr(\mathcal{D} \mid \mu_{u,k,k',v}) \Pr(\mu_{u,k,k',v} \mid \mathbf{x}_{u,v}, \boldsymbol{\beta}_{kk'}) d\mu_{u,k,k',v} \\ &\propto \text{NB}(\hat{m}_{u,k,k',v}; \tilde{\mu}_{u,k,k',v}, \sigma[\mathbf{x}_{u,v}^T \boldsymbol{\beta}_{kk'} + \log(T)]), \end{aligned}$$

where  $\sigma(x) = 1/(1 + \exp(-x))$  denotes the logistic function, and  $\text{NB}(\cdot)$  denotes the Negative-Binomial distribution. Using the Pólya-Gamma data augmentation strategy (Zhou et al., 2012; Polson et al., 2013), we first sample

$$\begin{aligned} (\omega_{u,k,k',v} \mid -) &\sim \text{PG}(\mu_{u,k,k',v} + \hat{m}_{u,k,k',v}, \psi_{u,k,k',v}), \\ (\psi_{u,k,k',v} \mid -) &\sim \mathcal{N}(\mu_\psi, \sigma_\psi), \end{aligned} \quad (9)$$

where PG denotes a Pólya-Gamma draw, and where

$$\begin{aligned} \psi_{u,k,k',v} &\equiv \mathbf{x}_{uv}^T \boldsymbol{\beta}_{kk'} + \log(T\pi_{uv}), \\ \pi_{uv} &\sim \log \mathcal{N}(0, \tau^{-1}) \\ \sigma_\psi &= [\omega_{u,k,k',v} + \tau]^{-1}, \\ \mu_\psi &= \sigma_\psi [(\hat{m}_{u,k,k',v} - \mu_{u,k,k',v})/2 + \tau(\mathbf{x}_{uv}^T \boldsymbol{\beta}_{kk'} + \log(T))], \end{aligned}$$

where  $\log \mathcal{N}(\cdot)$  denotes the lognormal distribution.

**Sampling the regression coefficients  $\{\boldsymbol{\beta}_{kk'}\}$ :** Given  $\{\boldsymbol{\psi}_{kk'} \equiv (\psi_{1kk'1}, \dots, \psi_{Ukk'V})\}$ , we sample  $\{\boldsymbol{\beta}_{kk'}\}$  as

$$(\boldsymbol{\beta}_{k,k'} \mid -) \sim \mathcal{N}(\boldsymbol{\mu}_\beta, \boldsymbol{\Sigma}_\beta), \quad (10)$$

where  $\boldsymbol{\Sigma}_\beta = (\tau \mathbf{X}^T \mathbf{X} + \mathbf{A})^{-1}$ ,  $\mathbf{A} \equiv \text{diag}[\nu_1^{-1}, \dots, \nu_D^{-1}]$ ,  $\boldsymbol{\mu}_\beta = \tau \boldsymbol{\Sigma}_\beta \mathbf{X}^T (\boldsymbol{\psi}_{kk'} - \log(T))$ , and  $\mathbf{X} \equiv [\mathbf{x}_{11}, \dots, \mathbf{x}_{UV}]^T$ .

The full procedure of our Gibbs sampler is summarized in Algorithm 1.

---

**Algorithm 1** Gibbs Sampler for the Hawkes Edge Partition Model

---

**Input:** events data  $\mathcal{D} = \{(t_i, s_i, d_i)\}_{i=1}^N$ ,  $\{\Phi, \Omega\}$  inferred by the HGaP-EPM, maximum iterations  $\mathcal{J}$

**Output:**  $\{\mu_{u,k,k',v}\}$ ,  $\{\alpha_{kk'}\}$ ,  $\{(z_i^s, z_i^d)\}$

- 1: **for**  $l = 1:\mathcal{J}$  **do**
  - 2:   **for**  $n = 1:N$  **do**
  - 3:     Sample  $b_i$  (Eq. 2)
  - 4:     Sample the latent variables  $(z_i^s, z_i^d)$  (Eq. 3)
  - 5:     Update the intensity function  $\lambda_{u,v}(t_i)$  (Eq. 1)
  - 6:   **end for**
  - 7:   Update  $\hat{m}_{u,k,k',v}$  and  $\check{m}_{u,k,k',v}$  (Eq. 5)
  - 8:   Sample the base intensities  $\{\mu_{u,k,k',v}\}$  (Eq. 8)
  - 9:   Sample the parameters  $\{\boldsymbol{\beta}_{kk'}\}$ ,  $\{\omega_{u,k,k',v}\}$ ,  $\{\psi_{u,k,k',v}\}$  (Eqs. 10; 9)
  - 10:   Sample the kernel parameters  $\{\alpha_{k,k'}\}$  (Eq. 7)
  - 11: **end for**
-

## B BASELINE MODELS

**The Hawkes Edge Partition Model (Hawkes-EPM)** For each pair of nodes  $(u, v)$ ,  $u, v \in \mathcal{V}$ , and  $u \neq v$ ,

$$\begin{aligned}\mu_{u,k,k',v} &\sim \text{Gamma}(\tilde{\mu}_{u,k,k',v}, 1/(\exp[-\mathbf{x}_{u,v}^T \boldsymbol{\beta}_{kk'}])), \\ \tilde{\mu}_{u,k,k',v} &\equiv \phi_{u,k} \Omega_{k,k'} \phi_{v,k'}, \\ \boldsymbol{\beta}_{k,k'} &\sim \mathcal{N}(\mathbf{0}, \mathbf{A}), \\ \alpha_{kk'} &\sim \text{Gamma}(e_0, 1/f_0), \\ \lambda_{u,v}(t) &= \sum_{k,k'} \left\{ \mu_{u,k,k',v} + \sum_{j:t_j \in \mathcal{H}_{v,k',k,u}(t)} \alpha_{kk'} \exp[-(t-t_j)/\delta] \right\}, \\ N_{uv}(t) &\sim \text{Hawkes Process}(\lambda_{uv}(t)),\end{aligned}$$

where  $\mathbf{A} \equiv \text{diag}[\nu_1^{-1}, \dots, \nu_D^{-1}]$ .

**The Hawkes Dual Latent Space (DLS) (Yang et al., 2017)** For each pair of nodes  $(u, v)$ ,  $u, v \in \mathcal{V}$ , and  $u \neq v$ ,

$$\begin{aligned}\mathbf{z}_v &\sim \mathcal{N}(\mathbf{0}, \sigma^2 \mathbf{I}_{d \times d}), \\ \boldsymbol{\mu}_v &\sim \mathcal{N}(\mathbf{0}, \sigma_\mu^2 \mathbf{I}_{d \times d}), \\ \boldsymbol{\epsilon}_v^{(b)} &\sim \mathcal{N}(\mathbf{0}, \sigma_\epsilon^2 \mathbf{I}_{d \times d}), \\ \mathbf{x}_v^{(b)} &\sim \boldsymbol{\mu}_v + \boldsymbol{\epsilon}_v^{(b)}, \\ \lambda_{uv}(t) &= \phi e^{-\|\mathbf{z}_u - \mathbf{z}_v\|_2^2} + \sum_{j:t_j \in \mathcal{H}_{v,u}(t)} \sum_{b=1}^B \beta e^{-\|\mathbf{x}_u^{(b)} - \mathbf{x}_v^{(b)}\|_2^2} \gamma_b(t-t_j), \\ N_{uv}(t) &\sim \text{Hawkes Process}(\lambda_{uv}(t)).\end{aligned}$$

**The Community Hawkes Independent (CHIP) model**

$$\begin{aligned}c_u &\sim \text{Categorical}(\pi_1, \dots, \pi_k), \quad \forall u \in \mathcal{V} \\ \lambda_{uv}(t) &= \phi_{c_u, c_v} + \sum_{j:t_j \in \mathcal{H}_{v,u}(t)} \alpha_{c_u, c_v} \exp\{-(t-t_j)/\beta_{c_u, c_v}\}, \\ N_{uv}(t) &\sim \text{Hawkes Process}(\lambda_{uv}(t)).\end{aligned}$$

**The Hawkes Stochastic Block (Hawkes-SBM) model**

$$\begin{aligned}c_u &\sim \text{Categorical}(\pi_1, \dots, \pi_k), \quad \forall u \in \mathcal{V} \\ \lambda_{k,k'}(t) &= \phi_{k,k'} + \sum_{j:t_j \in \mathcal{H}_{k',k}(t)} \alpha_{k,k'} \exp\{-(t-t_j)/\beta_{k,k'}\}, \\ N_{k,k'}(t) &\sim \text{Hawkes Process}(\lambda_{k,k'}(t)).\end{aligned}$$

**The Mutually Exciting Hawkes processes (MHPs) model**

$$\begin{aligned}\lambda_{uv}(t) &= \phi + \sum_{j:t_j \in \mathcal{H}_{v,u}(t)} \sum_{b=1}^B \beta_b \gamma_b(t-t_j), \\ N_{uv}(t) &\sim \text{Hawkes Process}(\lambda_{uv}(t)).\end{aligned}$$

**Poisson process (PPs) model**

$$\begin{aligned}\lambda_{uv}(t) &= \phi_{uv}, \\ N_{uv}(t) &\sim \text{Poisson Process}(\lambda_{uv}(t)).\end{aligned}$$

## C NUMERICAL SIMULATIONS

In this experiment we use synthetic data to evaluate the performance of the Hawkes-EPM in estimating the kernel parameters. We consider a collection of nodes  $|\mathcal{V}| = 100$ , and  $K = 4$  latent communities. We generated the base rate  $\mu_k \sim \text{Uniform}[0, 1]$ , and set the kernel parameters  $[\alpha_1, \alpha_2, \alpha_3, \alpha_4] = [0.5, 0.88, 1.38, 1.96]$ , and  $\delta = 0.45$ . Via the derived Gibbs sampler, the Hawkes-EPM infers the number of latent communities. As shown in Figure (1), the posterior distributions of the estimated  $\{\alpha_k\}$  concentrate toward the true values as the number of observed events is increasing.

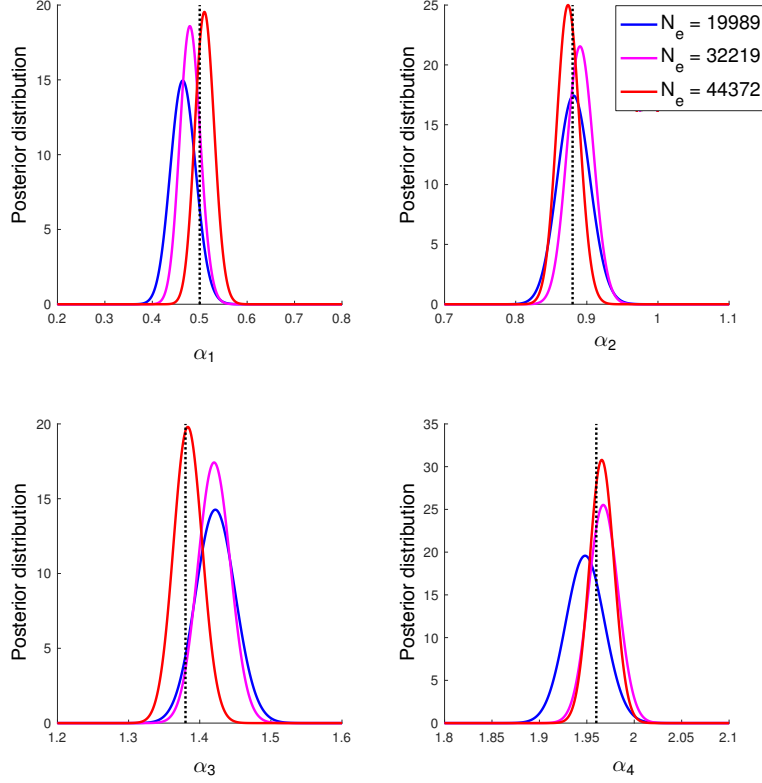

Figure 1: The posterior distribution of the estimated parameters  $\{\alpha_k\}$  for the four simulations with the number of events  $N_e$ . The dashed line indicates the true values of  $\{\alpha_k\}$ .

## D ADDITIONAL RESULTS

Figures 2 to 4 present the additional plots of the intensities of the interaction events between the nations: Iran (IRN)-USA, Israel (ISR)-Leban (LEB), Israel (ISR)-Palestin(PAL),Iraq (IRQ)-Israel (ISR), Iraq (IRQ)-Kuwait (KUW), Iraq (IRQ)-Saudi Arabi (SAU), USA-Kuwait (KUW), Iraq (IRQ)-Turkey (TUR), United Kingdom (UNK)-Iraq (IRQ).

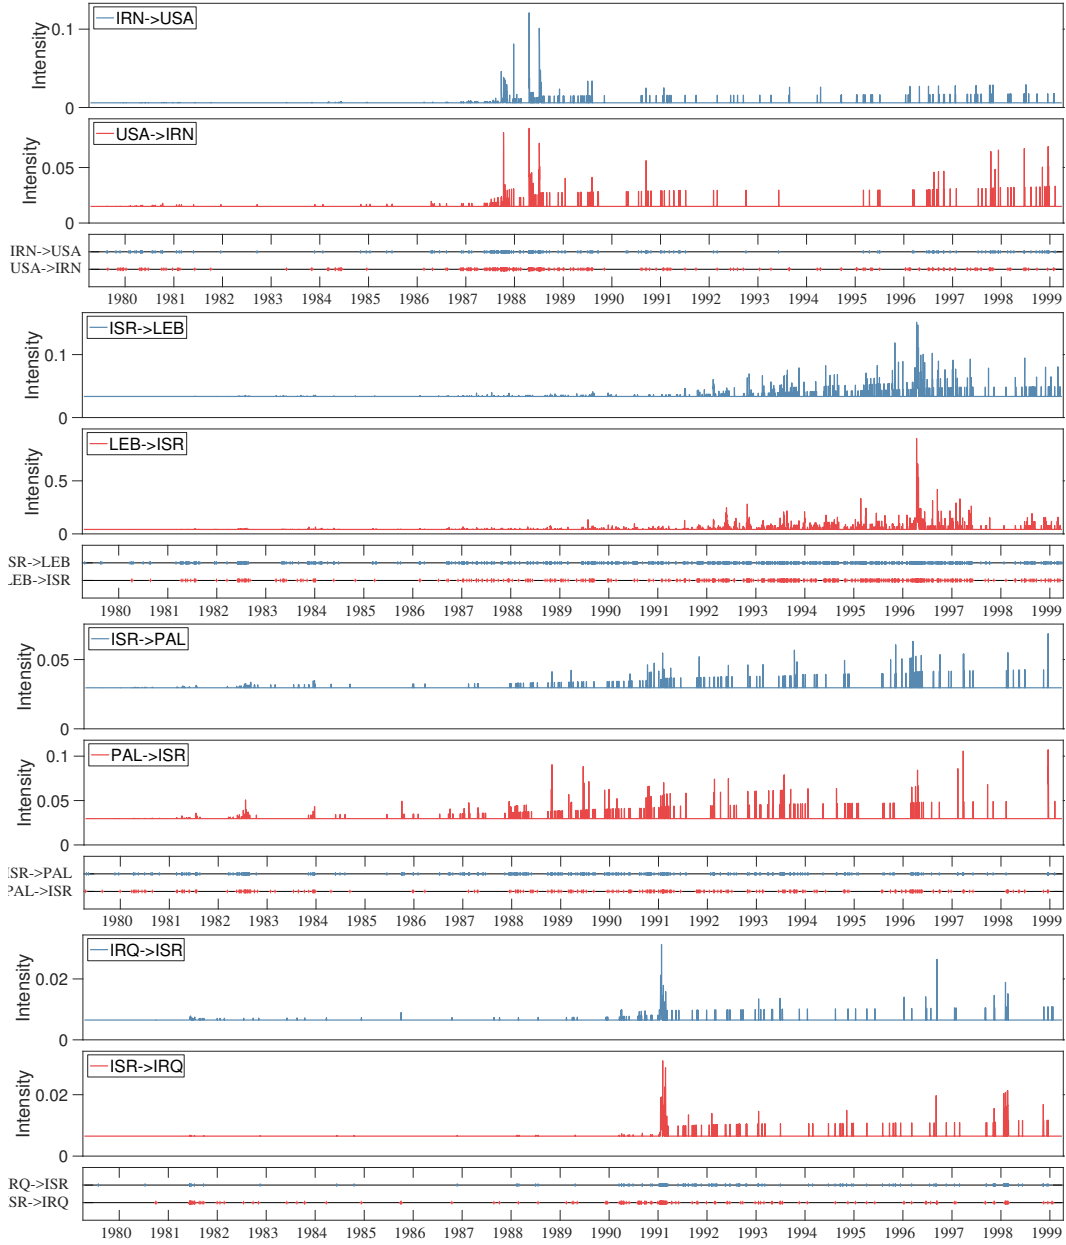

Figure 2: The plots show the intensity of interaction events among nations inferred by the Hawkes-EPM in the Gulf dataset.

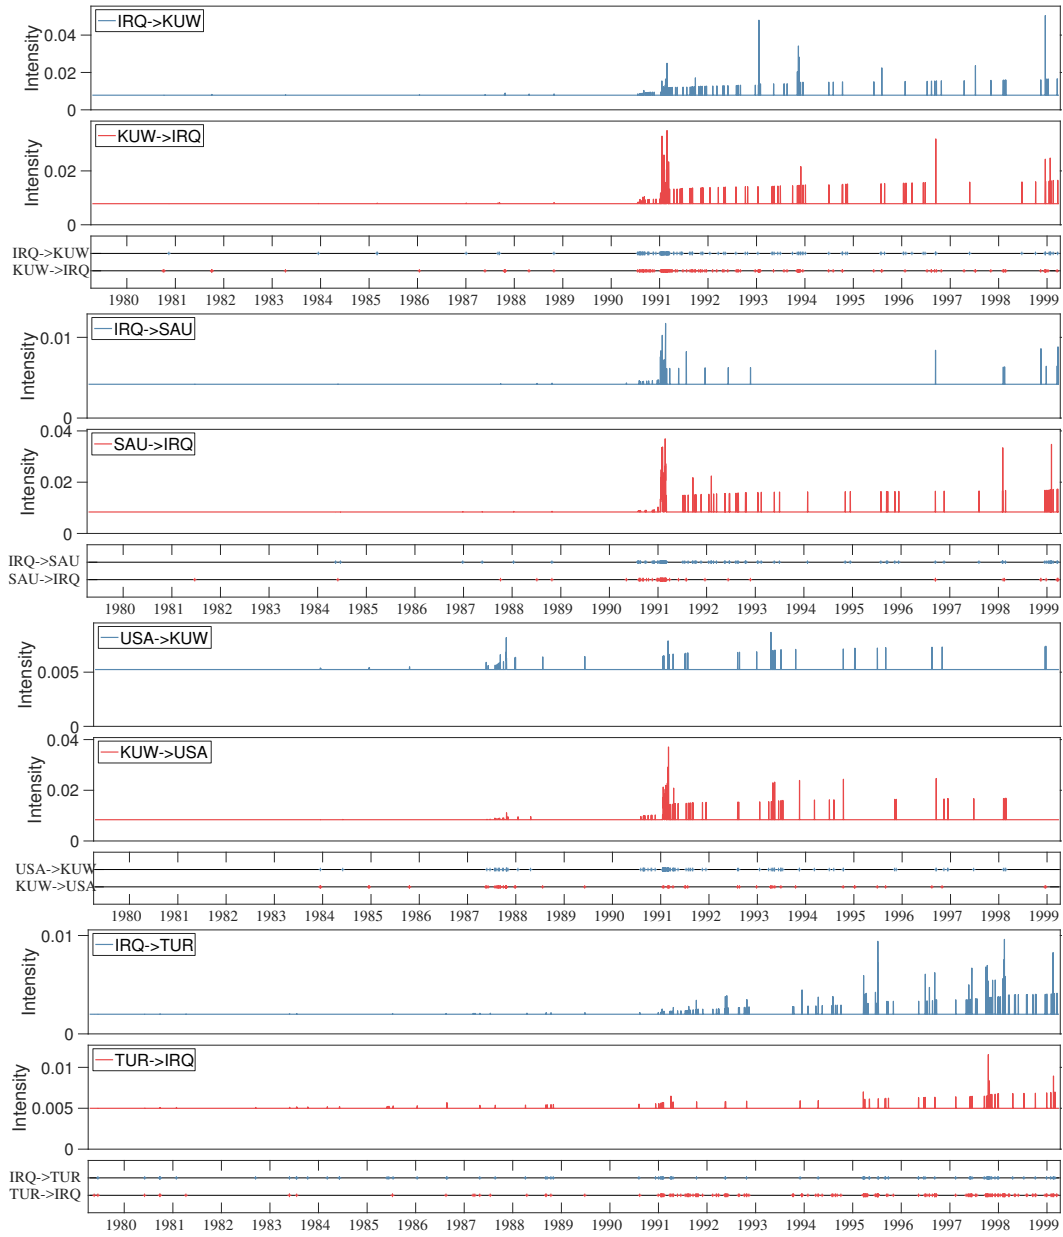

Figure 3: The plots show the intensity of interaction events among nations inferred by the Hawkes-EPM in the Gulf dataset.

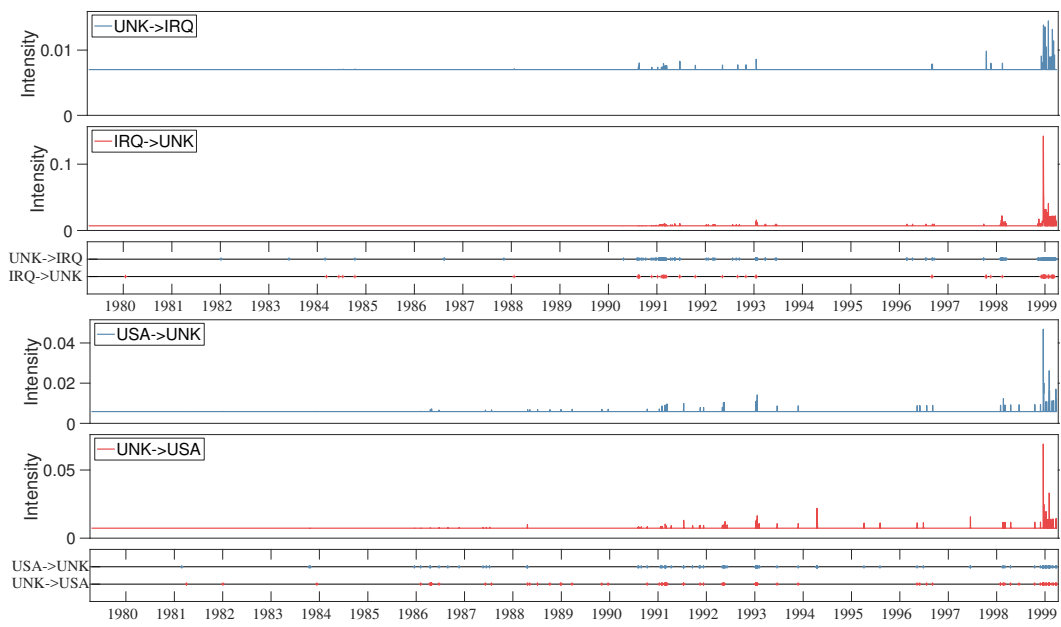

Figure 4: The plots show the intensity of interaction events among nations inferred by the Hawkes-EPM in the Gulf dataset.

## References

- Polson, N. G. et al. (2013). Bayesian inference for logistic models using Pólya–Gamma latent variables. *Journal of the American Statistical Association*, 108(504):1339–1349.
- Yang, J. et al. (2017). Decoupling homophily and reciprocity with latent space network models. In *Proceedings of the Thirty-Third Conference on Uncertainty in Artificial Intelligence*.
- Zhou, M. et al. (2012). Lognormal and gamma mixed negative binomial regression. In *Proceedings of the 31st International Conference on Machine Learning*, pages 1343–1350.
